# Supplementary material for: Retracted Article: Ginsenoside Rf alleviates dysmenorrhea and inflammation through the BDNF-TrkB-CREB pathway in a rat model of endometriosis
Source: Royal Society of Chemistry journal article supplement (doi:10.1039/c8fo01839a), 2018-12-14
Supplement: c8fo01839a1.pdf [file c8fo01839a1.pdf]

**Supplemental table 1. Primers used for transcript quantification by real-time PCR.**

| <b>Name</b>   | <b>Sequence</b>                                             |
|---------------|-------------------------------------------------------------|
| GAPDH         | FOR: TGCTGAGTATGTCGTGGAG<br>REV: GTCTTCTGAGTGGCAGTGAT       |
| VEGF          | FOR: GGCTCACTTCCAGAAACACG<br>REV: GTGCTCTTGCAGAATCTAGTGG    |
| iNOS          | FOR: TTGGAGCGAGTTGTGGATTG<br>REV: TGAGGGCTTGCCTGAGTGA       |
| IL-1 $\beta$  | FOR: CCTCTGACAGGCAACCACTTA<br>REV: GCACTGGTCCAAATTCAATTC    |
| TNF- $\alpha$ | FOR: CTGGCGTGTTTCATCCGTTCT<br>REV: GCCACTACTTCAGCGTCTCGT    |
| BDNF          | FOR: AGCTGAGCGTG TGTGACAGTAT<br>REV: CCGAACATACGATTGGGTAGTT |
| TrkB          | FOR: GCACATCGCTCAGCAAATCG<br>REV: ACAACTCCCAGGCTCCAGAC      |
| p-CREB        | FOR: CCCAGGGAGGAGCAATACAG<br>REV: GGGAGGACGCCATAACAACCT     |
